# Supplementary material for: Modification of Fe3O4 superparamagnetic nanoparticles with zirconium oxide; preparation, characterization and its application toward fluoride removal
Source: Royal Society of Chemistry journal article supplement (doi:10.1039/c5ra14833b), 2015-01-01

# Modification of Fe<sub>3</sub>O<sub>4</sub> Superparamagnetic Nanoparticles with Zirconium Oxide; Preparation, Characterization and its Application toward Fluoride Removal

F. Riahi<sup>a</sup>, M. Bagherzadeh<sup>\*,a</sup> and Z. Hadizadeh<sup>b</sup>

<sup>a</sup> Material Research School, NSTRI, 81465-1589, Isfahan, I.R. IRAN.

<sup>b</sup> Islamic Azad University, Shahreza Branch, Shahreza, I.R. IRAN.

## SUPPLEMENTARY MATERIALS

**Fig. S1.** The calibration curve (inset) was obtained from the decreasing in intensity absorption of reagents in 531 nm during addition of the standard sodium fluoride solutions (0.1– 1.0 mg L<sup>-1</sup>).

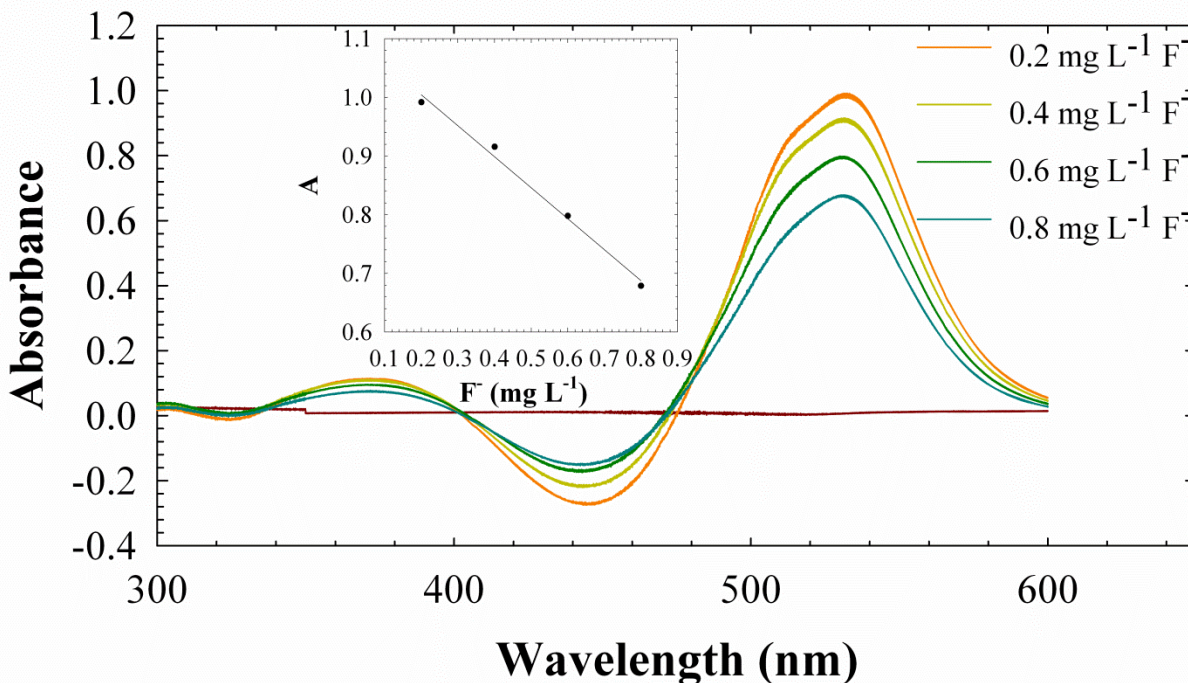

**Fig. S2.** The zeta potential distribution measured for as-prepared  $\text{Fe}_3\text{O}_4@\text{ZrO}_2$  (2:5) nanoparticles at 25 °C.

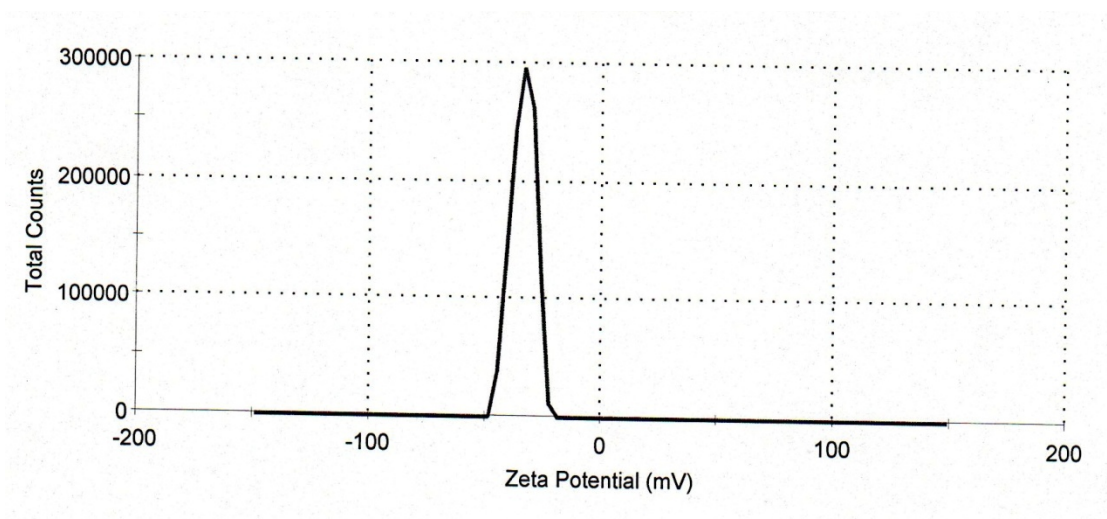

Supplement: c5ra14833b1.pdf [file c5ra14833b1.pdf]
